# Supplementary material for: Morphometric and Nanomechanical Features of Erythrocytes Characteristic of Early Pregnancy Loss
Source: MDPI journal article supplement (doi:10.3390/ijms23094512), 2022-04-19
Supplement: s1 [file s1]

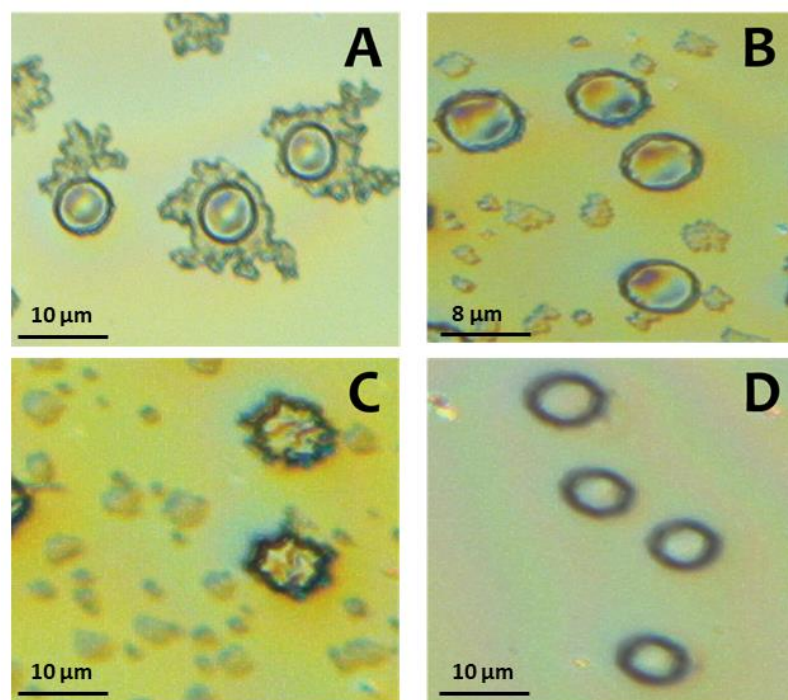

**Figure S1.** Representative optical microscopy images of four morphological types of erythrocytes observed in the process of their aging: (A) biconcave; (B) crenated; (C) spiculocytes and (D) spherocytes.

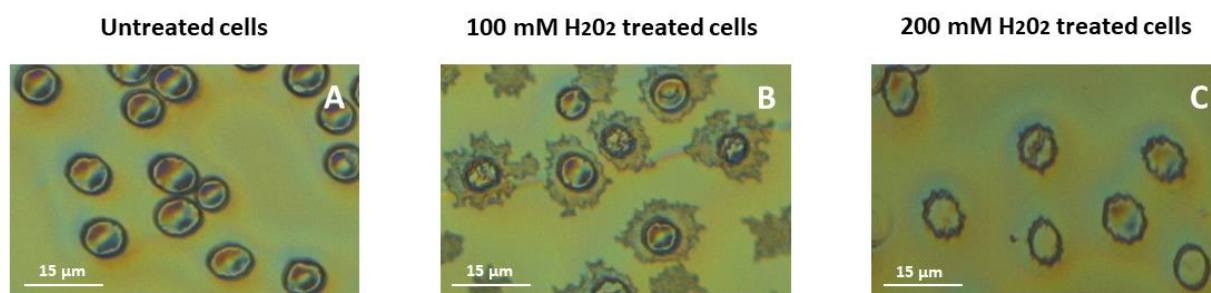

**Figure S2.** Representative images obtained by means of optical microscopy of untreated red blood cells (A) and cells treated with 100 mM (B) and 200 mM (C) H<sub>2</sub>O<sub>2</sub>.

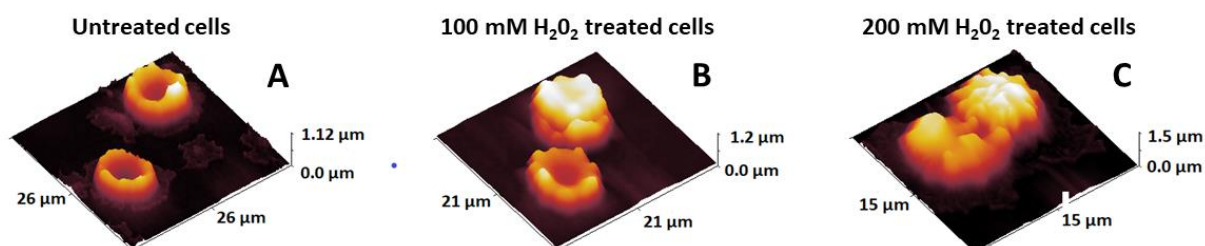

**Figure S3.** Representative 3D AFM images of untreated erythrocytes (A) and erythrocytes following exposure to H<sub>2</sub>O<sub>2</sub> solution (B,C) .

**Table S1.** Pearson correlation coefficient,  $r$ , calculated for the pair of parameters Young's modulus and membrane roughness for RBCs of the studied groups of women.

| Group | Young's Modulus, $E_a$                 | Membrane Roughness, $R_{rms}$ |
|-------|----------------------------------------|-------------------------------|
|       | Pearson's Correlation Coefficient, $r$ |                               |
| NPC   | -0.97                                  |                               |
| PC    | -0.98                                  |                               |
| MS    | -0.96                                  |                               |
